# Supplementary material
Source: MDPI journal article supplement (https://www.mdpi.com/2504-446X/7/12/689)
Supplement: s1 [file s1]

Archive with 1 entries (1 files):
- drones-2685537-supplementary.pdf
